# Supplementary material for: Antioxidative Properties of Fermented Soymilk Using Lactiplantibacillus plantarum LP95
Source: MDPI journal article supplement (doi:10.3390/antiox12071442), 2023-07-18
Supplement: s1 [file s1]

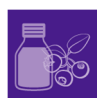

**Table S1.** Viable cell count (log CFU/mL) of *Lp. plantarum* LP95 during preliminary fermentation trial of soymilk at 20 °C, 28 °C and 37 °C. All values are expressed as mean  $\pm$  standard deviation ( $n = 3$ ). Different lowercase letters in each row indicate significant differences ( $p < 0.05$ ).

| Fermentation time<br>(hours) | Viable cell count<br>20 °C   | Viable cell count<br>28 °C   | Viable cell count<br>37 °C   |
|------------------------------|------------------------------|------------------------------|------------------------------|
| 0                            | 7.29 $\pm$ 0.01 <sup>a</sup> | 7.30 $\pm$ 0.01 <sup>a</sup> | 7.32 $\pm$ 0.02 <sup>a</sup> |
| 3                            | 7.53 $\pm$ 0.02 <sup>c</sup> | 8.01 $\pm$ 0.03 <sup>b</sup> | 8.19 $\pm$ 0.03 <sup>a</sup> |
| 6                            | 7.85 $\pm$ 0.01 <sup>c</sup> | 8.70 $\pm$ 0.01 <sup>b</sup> | 8.89 $\pm$ 0.01 <sup>a</sup> |
| 9                            | 8.25 $\pm$ 0.03 <sup>c</sup> | 8.93 $\pm$ 0.01 <sup>b</sup> | 9.03 $\pm$ 0.04 <sup>a</sup> |
| 24                           | 9.17 $\pm$ 0.03 <sup>a</sup> | 9.21 $\pm$ 0.04 <sup>a</sup> | 9.23 $\pm$ 0.05 <sup>a</sup> |
| 32                           | 9.20 $\pm$ 0.04 <sup>a</sup> | 9.23 $\pm$ 0.04 <sup>a</sup> | 9.25 $\pm$ 0.06 <sup>a</sup> |
| 48                           | 9.17 $\pm$ 0.05 <sup>a</sup> | 9.20 $\pm$ 0.02 <sup>a</sup> | 9.24 $\pm$ 0.04 <sup>a</sup> |
| 72                           | 9.16 $\pm$ 0.03 <sup>a</sup> | 9.21 $\pm$ 0.04 <sup>a</sup> | 9.15 $\pm$ 0.05 <sup>a</sup> |

**Table S2.** Changes in pH during preliminary fermentation trial of soymilk with *Lp. plantarum* LP95 at 20 °C, 28 °C and 37 °C. All values are expressed as mean  $\pm$  standard deviation ( $n = 3$ ). Different lowercase letters in each row indicate significant differences ( $p < 0.05$ ).

| Fermentation time<br>(hours) | pH 20 °C                     | pH 28 °C                     | pH 37 °C                     |
|------------------------------|------------------------------|------------------------------|------------------------------|
| 0                            | 6.40 $\pm$ 0.02 <sup>a</sup> | 6.40 $\pm$ 0.03 <sup>a</sup> | 6.40 $\pm$ 0.02 <sup>a</sup> |
| 3                            | 6.30 $\pm$ 0.02 <sup>a</sup> | 6.23 $\pm$ 0.02 <sup>b</sup> | 6.10 $\pm$ 0.02 <sup>c</sup> |
| 6                            | 6.20 $\pm$ 0.03 <sup>a</sup> | 5.65 $\pm$ 0.01 <sup>b</sup> | 5.33 $\pm$ 0.01 <sup>c</sup> |
| 9                            | 5.98 $\pm$ 0.02 <sup>a</sup> | 5.31 $\pm$ 0.02 <sup>b</sup> | 4.94 $\pm$ 0.04 <sup>c</sup> |
| 24                           | 5.05 $\pm$ 0.03 <sup>a</sup> | 4.73 $\pm$ 0.03 <sup>b</sup> | 4.27 $\pm$ 0.03 <sup>c</sup> |
| 32                           | 4.95 $\pm$ 0.03 <sup>a</sup> | 4.59 $\pm$ 0.01 <sup>b</sup> | 4.18 $\pm$ 0.03 <sup>c</sup> |
| 48                           | 4.76 $\pm$ 0.02 <sup>a</sup> | 4.41 $\pm$ 0.02 <sup>b</sup> | 4.15 $\pm$ 0.02 <sup>c</sup> |
| 72                           | 4.47 $\pm$ 0.03 <sup>a</sup> | 4.12 $\pm$ 0.02 <sup>b</sup> | 4.10 $\pm$ 0.03 <sup>b</sup> |

**Table S3.** Changes of viable cell count (log CFU/mL) and pH in soymilk during the fermentation (37 °C) and storage stage (4 °C) using *Lp. plantarum* LP95 as starter. All values are expressed as mean  $\pm$  standard deviation ( $n = 3$ ). Different lowercase letters in each column indicate significant differences ( $p < 0.05$ ).

| Stages               | Time | Viable cell count            | pH                           |
|----------------------|------|------------------------------|------------------------------|
| Fermentation (hours) | 0    | 8.03 $\pm$ 0.03 <sup>e</sup> | 6.41 $\pm$ 0.01 <sup>a</sup> |
|                      | 3    | 8.29 $\pm$ 0.02 <sup>d</sup> | 5.99 $\pm$ 0.02 <sup>b</sup> |
|                      | 6    | 9.05 $\pm$ 0.04 <sup>b</sup> | 5.18 $\pm$ 0.02 <sup>c</sup> |
|                      | 9    | 9.15 $\pm$ 0.02 <sup>a</sup> | 4.82 $\pm$ 0.03 <sup>d</sup> |
|                      | 24   | 9.20 $\pm$ 0.03 <sup>a</sup> | 4.17 $\pm$ 0.03 <sup>e</sup> |
| Storage (days)       | 1    | 9.21 $\pm$ 0.04 <sup>a</sup> | 4.16 $\pm$ 0.01 <sup>e</sup> |
|                      | 7    | 9.05 $\pm$ 0.05 <sup>b</sup> | 4.15 $\pm$ 0.01 <sup>e</sup> |
|                      | 14   | 8.68 $\pm$ 0.01 <sup>c</sup> | 4.16 $\pm$ 0.02 <sup>e</sup> |
|                      | 21   | 8.10 $\pm$ 0.03 <sup>e</sup> | 4.15 $\pm$ 0.02 <sup>e</sup> |
|                      | 28   | 7.70 $\pm$ 0.04 <sup>f</sup> | 4.15 $\pm$ 0.02 <sup>e</sup> |
|                      | 35   | 7.60 $\pm$ 0.02 <sup>g</sup> | 4.14 $\pm$ 0.03 <sup>e</sup> |
|                      | 42   | 7.51 $\pm$ 0.01 <sup>h</sup> | 4.14 $\pm$ 0.02 <sup>e</sup> |
|                      | 49   | 7.48 $\pm$ 0.02 <sup>h</sup> | 4.14 $\pm$ 0.01 <sup>e</sup> |

**Table S4.** Values of consistency coefficient ( $K$ ) and flow behavior index ( $n$ ) obtained by fitting the flow curves with Ostwald de Waele model. All values are expressed as mean  $\pm$  standard deviation ( $n = 3$ ). Different lowercase letters in each column indicate significant differences ( $p < 0.05$ ).

|                           | $K$                          | $n$                          | $R^2$ |
|---------------------------|------------------------------|------------------------------|-------|
| Fermentation stage (37°C) |                              |                              |       |
| 0 hour                    | 0.70 $\pm$ 0.04 <sup>b</sup> | 0.68 $\pm$ 0.01 <sup>a</sup> | 0.992 |
| 24 hours                  | 5.27 $\pm$ 0.23 <sup>a</sup> | 0.41 $\pm$ 0.01 <sup>b</sup> | 0.990 |
| Storage stage (4°C)       |                              |                              |       |
| 0 day                     | 7.40 $\pm$ 0.19 <sup>a</sup> | 0.39 $\pm$ 0.01 <sup>b</sup> | 0.995 |
| 21 days                   | 7.18 $\pm$ 0.25 <sup>a</sup> | 0.35 $\pm$ 0.01 <sup>c</sup> | 0.986 |
| 49 days                   | 3.36 $\pm$ 0.21 <sup>b</sup> | 0.44 $\pm$ 0.01 <sup>a</sup> | 0.977 |

Ostwald de Waele model:  $\tau = K \cdot \dot{\gamma}^n$

where  $\tau$  is the shear stress (Pa),  $\dot{\gamma}$  the shear rate (1/s),  $K$  is the consistency coefficient (Pa  $\cdot$  s <sup>$n$</sup> ), corresponding to the fluid consistency and  $n$  is the flow behaviour index (dimensionless number).

For  $n$  values =1 the fluid behaves as a Newtonian fluid, for  $n < 1$  the fluid is considered pseudoplastic or shear thinning fluid, and for  $n > 1$  the fluid behaves as dilatant or shear thickening fluid.

**Table S5.** Apparent viscosity (Pa s) at 50 s<sup>-1</sup> of soymilk during fermentation stage at 37 °C using *Lp. plantarum* LP95 as starter. All values are expressed as mean  $\pm$  standard deviation ( $n = 3$ ). Different lowercase letters in each row indicate significant differences ( $p < 0.05$ ).

| Fermentation stage (hours)     |                                |
|--------------------------------|--------------------------------|
| 0                              | 24                             |
| 0.195 $\pm$ 0.003 <sup>a</sup> | 0.573 $\pm$ 0.028 <sup>b</sup> |

**Table S6.** Apparent viscosity (Pa s) at 50 s<sup>-1</sup> of fermented soymilk during storage stage at 4 °C using *Lp. plantarum* LP95 as starter. All values are expressed as mean  $\pm$  standard deviation ( $n = 3$ ). Different lowercase letters in each row indicate significant differences ( $p < 0.05$ ).

| Storage stage 4 °C (days)      |                                |                                |                                |                                |                                |                                |                                |
|--------------------------------|--------------------------------|--------------------------------|--------------------------------|--------------------------------|--------------------------------|--------------------------------|--------------------------------|
| 0                              | 7                              | 14                             | 21                             | 28                             | 35                             | 42                             | 49                             |
| 0.670 $\pm$ 0.018 <sup>a</sup> | 0.706 $\pm$ 0.045 <sup>a</sup> | 0.628 $\pm$ 0.068 <sup>a</sup> | 0.564 $\pm$ 0.033 <sup>b</sup> | 0.492 $\pm$ 0.030 <sup>b</sup> | 0.434 $\pm$ 0.027 <sup>c</sup> | 0.397 $\pm$ 0.022 <sup>c</sup> | 0.368 $\pm$ 0.021 <sup>c</sup> |

**Table S7.** Variations of Total Antioxidant Activity (TEAC; mg Trolox Eq. 100 g<sup>-1</sup> D.W.) in soymilk during fermentation stage using *Lp. plantarum* LP95 as starter. All values are expressed as mean  $\pm$  standard deviation ( $n = 3$ ). Different lowercase letters in each row indicate significant differences ( $p < 0.05$ ).

| Fermentation stage (hours)     |                                |                                |                                |                                |
|--------------------------------|--------------------------------|--------------------------------|--------------------------------|--------------------------------|
| 0                              | 3                              | 6                              | 9                              | 24                             |
| 123.35 $\pm$ 1.58 <sup>a</sup> | 110.30 $\pm$ 6.03 <sup>b</sup> | 121.42 $\pm$ 5.26 <sup>a</sup> | 105.79 $\pm$ 2.34 <sup>b</sup> | 108.76 $\pm$ 3.25 <sup>b</sup> |

**Table S8.** Variations of Thiobarbituric Acid Reactive-Substances (TBARS;  $\mu$ g MDA Eq. 100 g<sup>-1</sup> D.W.) in soymilk during fermentation stage using *Lp. plantarum* LP95 as starter. All values are expressed as mean  $\pm$  standard deviation ( $n = 3$ ). Different lowercase letters in each row indicate significant differences ( $p < 0.05$ ).

| Fermentation stage (hours)    |                               |                               |                               |                               |
|-------------------------------|-------------------------------|-------------------------------|-------------------------------|-------------------------------|
| 0                             | 3                             | 6                             | 9                             | 24                            |
| 97.11 $\pm$ 1.33 <sup>a</sup> | 80.26 $\pm$ 2.12 <sup>b</sup> | 65.53 $\pm$ 1.30 <sup>c</sup> | 66.68 $\pm$ 1.35 <sup>c</sup> | 40.17 $\pm$ 1.88 <sup>d</sup> |
